# Supplementary material for: A Novel Steady-state Chemiluminescent Aptasensor using Rolling Circle Amplification Products DNA Hydrogel for Rapid and Ultra-sensitive Detection of Salmonella Typhimurium in Chicken
Source: Research Square preprint supplement (doi:10.21203/rs.3.rs-8569290/v1), 2026-01-23
Supplement: Supplementary file 1 [file df8bf9e1808a7fa6d1631a22.docx]

**A Novel Steady-state Chemiluminescent Aptasensor using Rolling Circle Amplification Products DNA Hydrogel for Rapid and Ultra-sensitive Detection of *Salmonella Typhimurium* in Chicken**

Liling Haoa, Jifan Huanga, Mengqiu Lia, Yihang Yanga, Jiaqi Hana, Hui Caoa, Tai Yea, Xiuxiu Wua, Huajie Gub, Fei Xua*

a: School of Health Science and Engineering, Shanghai Engineering Research Center for Food Rapid Detection, University of Shanghai for Science and Technology, Shanghai, 200093, China,

b: School of Chemistry and Life Sciences, Suzhou University of Science and Technology, Suzhou, 215009, China,

*E-mail of the corresponding author: xufei8135@126.com

Table S1 DNA sequences used in this work.

| Oligonucleotides | DNA sequences |
| --- | --- |
| Aptamer | 5’-TAT GGC GGC GTC ACC CGA CGG GGA CTT GAC ATT ATG ACA G-3’ |
| Primer | 5’-CTG TCA TAA TGT CAA GTC CCC GTC G-3’ |
| RCA primer | 5’-GTC AAG TCC CCG TCG-3’ |
| Template 1 | 5’-PO4-GGA CTT GAC TAC ATG ACA CTA CAC TAC GCA AAA AAA AAA GCA GTC TAT GCT CAG CCA CAC AAC GAC GG-3’ |
| Template 2 | 5’-PO4-GGA CTT GAC AAC AAC ACA CAA CTC CAC GCT TTT TTT TTT GCC ACA CAC AAC ATC ACA CAC CAC GAC GG-3’ |

Table S2 The annealing parameters in the protocol.

|  | Temperature | Time |
| --- | --- | --- |
| Degeneration | 95°C | 2 min |
| Annealing | 65°C | 2 min |
| 60°C | 6 min |
| 60°C → 20°C | A decrease of 0.1°C per second |
| 20°C | 30 s |
| Finish | 4°C | 10 min |


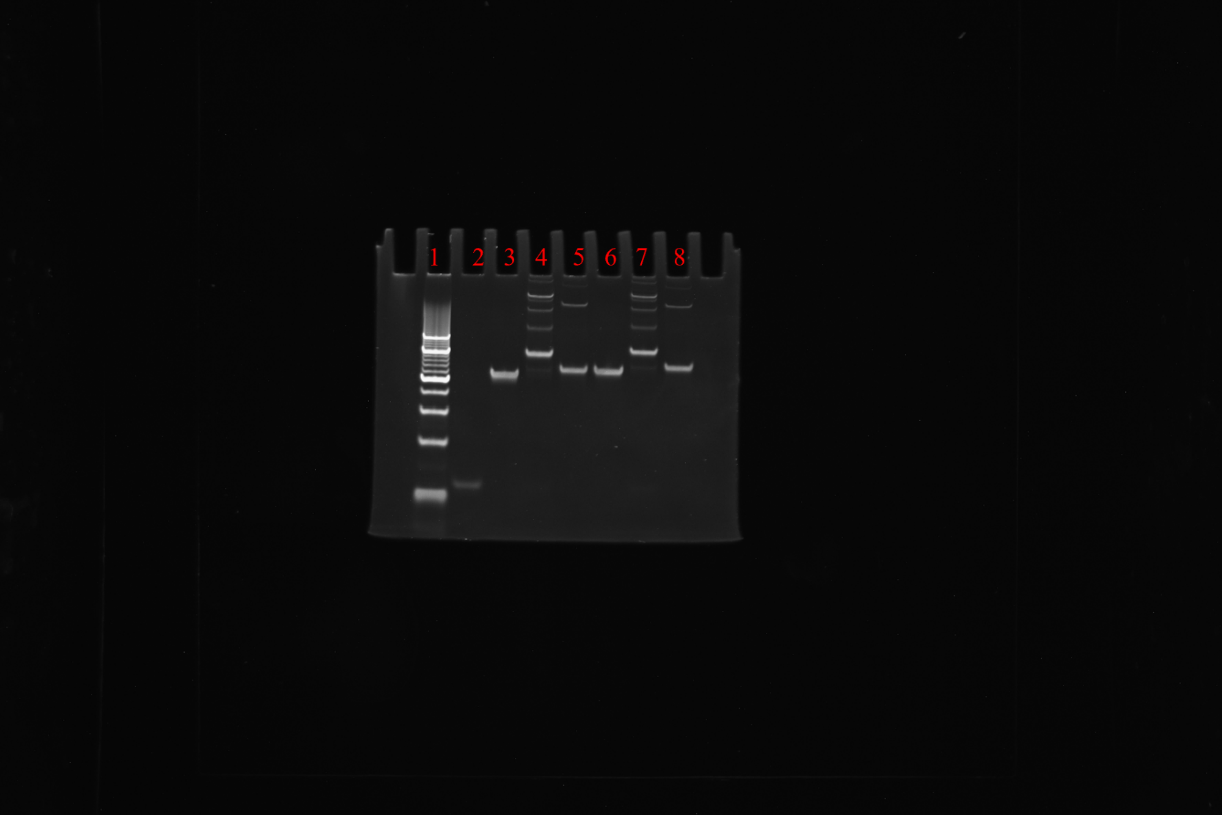


**Fig. S1** Native PAGE image, lane 1: DNA marker (10−150 bp); lane 2: primer; lane 3: linear template 1; lane 4: Circ-DNA 1; lane 5: purified Circ-DNA1; lane 6: linear template 2; lane 7: Circ-DNA2
